# Supplementary material
Source: PubMed Central journal article supplement (PMC8720510)
Supplement: NIHMS1644187-supplement-1.pdf [file NIHMS1644187-supplement-1.pdf]

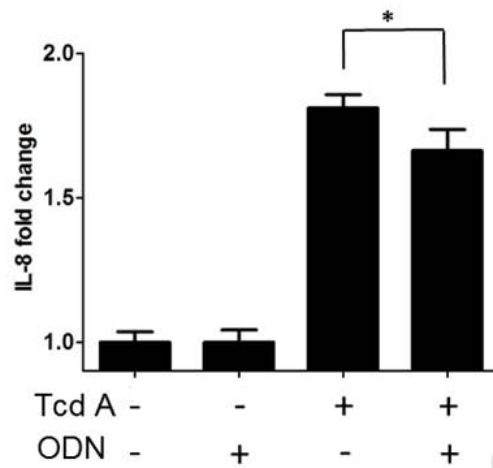

**Figure S2. TLR9 Antagonist ODN TTAGGG attenuates TcdA-induced IL-8 production in HT29 cells.** Human colonic epithelial HT-29 cells were treated with medium as a control (ctrl), 25 $\mu$ M ODN TTAGGG (ODN), TcdA (100nM) or TcdA together with ODN (TcdA+ODN) for 14 hours. IL-8 production was measured by ELISA and normalized into fold change. \* denotes  $p < 0.05$ , *Student's t-test*

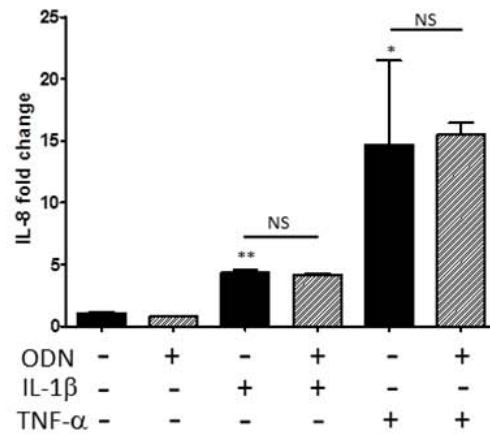

**Figure S3. TLR9 Antagonist ODN TTAGGG does not inhibit IL-8 production induced by IL-1 $\beta$  or TNF- $\alpha$  in HT29 cells.** Human colonic epithelial HT-29 cells were treated with medium as control (ctrl), 25  $\mu$ M ODN TTAGGG (ODN), IL-1 $\beta$  (1 ng/mL), TNF- $\alpha$  (10 ng/mL), or each cytokine in the presence of ODN (+ODN) for 14 hours. IL-8 production was measured by ELISA and normalized to fold change. \*\* denotes  $p < 0.01$  compared to medium control; \*denotes  $p < 0.05$  compared to medium control; NS denotes  $p > 0.05$  and statistically non-significant, *Student's t-test*
